# Supplementary material
Source: ML conference proceedings conference paper supplement (https://openaccess.thecvf.com/content/CVPR_2020/html/Jang_Generalized_Product_Quantization_CVPR_2020_paper.html)
Supplement: Supplementary file 1 [file Jang_Generalized_Product_Quantization_CVPR_2020_supplemental.pdf]

# Generalized Product Quantization Network for Semi-supervised Image Retrieval

- Supplementary Material -

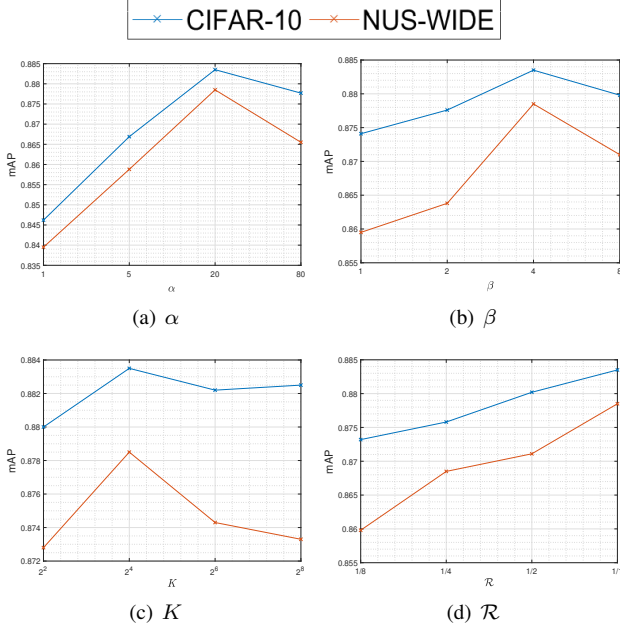

Figure 1. The results of hyper-parameter variants.

|          | Value |       |       |       |
|----------|-------|-------|-------|-------|
| $\alpha$ | 1     | 5     | 20    | 80    |
| $\beta$  | 1     | 2     | 4     | 8     |
| $K$      | $2^2$ | $2^4$ | $2^6$ | $2^8$ |
| $R$      | 1/8   | 1/4   | 1/2   | 1/1   |

Table 1. A list of Hyper-parameter values.

**Analysis on Hyper-parameters** As mentioned in section 4.2 of our original submission, we present additional information regarding hyper-parameters:  $\alpha$ ,  $\beta$ , and  $K$ . Besides, to see how GPQ actually uses unlabeled data, we set up a hyper-parameter  $R$  that determines the ratio of the total unlabeled data used for training. The default value is set as  $\{\alpha, \beta, K, R\} = \{20, 4, 2^4, 1/1\}$  in order, and we vary each hyper-parameters as listed in Table 1 while fixing others at defaults. We conduct experiments on CIFAR-10 and NUS-WIDE datasets for the binary code of 48-bits.

From Figure 1, we can see that trends of mAP scores according to variation of  $\alpha$  and  $K$  are similar to those observed in other deep quantization methods [1, 2]. The

hyper-parameter  $\beta$  that controls the randomness of predictions before applying softmax shows optimal performance at 4. The results of  $R$  related with the amount of unlabeled data justify that GPQ can fully utilize the unlabeled data to improve retrieval performance.

**Algorithm** We demonstrate our training process in Algorithm , where  $\gamma$  denotes learning rate. The result of entropy maximization and minimization can be observed in updating stage of  $\theta_C$  and  $\theta_F$ , respectively. Gradients generated from the unlabeled data in a batch do not flow directly into  $\theta_Z$ , however, previous ones can be reflected by initializing  $\theta_Z$  from  $\theta_C$ .

---

## Algorithm 1 GPQ training for batch size $B$

---

**Input:** Parameters of each component:  $\theta_F, \theta_Z, \theta_C$

**Input:** Batch  $\mathbf{B} = \{(I_1^L, y_1, I_1^U), \dots, (I_B^L, y_B, I_B^U)\}$

- 1: Initialize  $\theta_Z$  with  $\theta_C$  by soft assignment
- 2: **for**  $i$  in  $1 \dots B$  **do**
- 3:  $\hat{\mathbf{x}}_i^L, \hat{\mathbf{x}}_i^U \leftarrow F_{\theta_F}(I_i^L, I_i^U)$
- 4:  $\hat{\mathbf{q}}_i^L \leftarrow Z_{\theta_Z}(\hat{\mathbf{x}}_i^L)$
- 5:  $\hat{\mathbf{p}}_i^L, \hat{\mathbf{p}}_i^U \leftarrow C_{\theta_C}(\hat{\mathbf{x}}_i^L, \hat{\mathbf{x}}_i^U)$
- 6: **end for**
- 7: **if** label=true **then**
- 8:  $\ell_{N-PQ} \leftarrow \mathcal{L}_{N-PQ}$  with  $\{\hat{\mathbf{x}}_i^L, \hat{\mathbf{q}}_i^L, y_i\}_{i=1}^B$
- 9:  $\ell_{cls} \leftarrow \mathcal{L}_{cls}$  with  $\{\hat{\mathbf{p}}_i^L, y_i\}_{i=1}^B$
- 10: **else**
- 11:  $\ell_{SEM} \leftarrow \mathcal{L}_{SEM}$  with  $\{\hat{\mathbf{p}}_i^U\}_{i=1}^B$
- 12: **end if**
- 13:  $\theta_F \leftarrow \theta_F - \gamma \left( \frac{\partial \ell_{N-PQ}}{\partial \theta_F} + \frac{\partial \ell_{cls}}{\partial \theta_F} + \frac{\partial \ell_{SEM}}{\partial \theta_F} \right)$
- 14:  $\theta_Z \leftarrow \theta_Z - \gamma \frac{\partial \ell_{N-PQ}}{\partial \theta_Z}$
- 15:  $\theta_C \leftarrow \theta_C - \gamma \left( \frac{\partial \ell_{cls}}{\partial \theta_C} - \frac{\partial \ell_{SEM}}{\partial \theta_C} \right)$

**Output:** Updated  $\theta_F, \theta_Z, \theta_C$

---

## References

- [1] Benjamin Klein and Lior Wolf. End-to-end supervised product quantization for image search and retrieval. In *CVPR*, pages 5041–5050, 2019. 1
- [2] Tan Yu, Junsong Yuan, Chen Fang, and Hailin Jin. Product quantization network for fast image retrieval. In *ECCV*, pages 186–201, 2018. 1
